# Supplementary material for: Salient type 1 interleukin 1 receptor expression in peripheral non-immune cells
Source: PubMed Central journal article supplement (PMC5768710; doi:10.1038/s41598-018-19248-7), 2018-01-15
Supplement: 41598_2018_19248_MOESM1_ESM.pdf [file 41598_2018_19248_MOESM1_ESM.pdf]

## Supplementary Information

### Title

Salient type 1 interleukin 1 receptor expression in peripheral non-immune cells

### Authors and Affiliations

Anping Song<sup>1</sup>, Ling Zhu<sup>2,3</sup>, Gowthami Gorantla<sup>2</sup>, Olimpia Berdysz<sup>2</sup>, Stephanie A. Amici<sup>2,4</sup>, Mireia Guerau-de-Arellano<sup>2,4,5,6</sup>, Kathryn M. Madalena<sup>6,7</sup>, Jessica K. Lerch<sup>6,7</sup>, Xiaoyu Liu<sup>2,8,9</sup>, and Ning Quan<sup>2,8,9</sup>

<sup>1</sup> Department of Oncology, Tongji Hospital, Huazhong University of Science and Technology Tongji Medical College, Wuhan, Hubei, 430030, P.R.China

<sup>2</sup> Institute for Behavioral Medicine Research, College of Medicine, The Ohio State University, Columbus, OH 43210, USA

<sup>3</sup> West China School of Basic Medical Sciences and Forensic Medicine, Sichuan University, Chengdu, Sichuan, 610041, P.R.China

<sup>4</sup> School of Health and Rehabilitation Sciences, Division of Medical Laboratory Science, College of Medicine, Wexner Medical Center, The Ohio State University, Columbus, OH 43210, USA

<sup>5</sup> Department of Microbial Infection and Immunity, The Ohio State University, Columbus, OH 43210, USA

<sup>6</sup> Department of Neuroscience, The Ohio State University, Columbus, OH 43210, USA

<sup>7</sup> Center for Brain and Spinal Cord Repair, The Ohio State University, Columbus, OH 43210, USA

<sup>8</sup> Division of Biosciences, College of Dentistry, The Ohio State University, Columbus, OH 43210, USA

<sup>9</sup> Corresponding authors: Xiaoyu Liu and Ning Quan, Institute for Behavioral Medicine Research, 460 Medical Center Drive, Columbus, OH 43210, USA, [liu.1933@osu.edu](mailto:liu.1933@osu.edu) or [quan.14@osu.edu](mailto:quan.14@osu.edu)

Figure S1

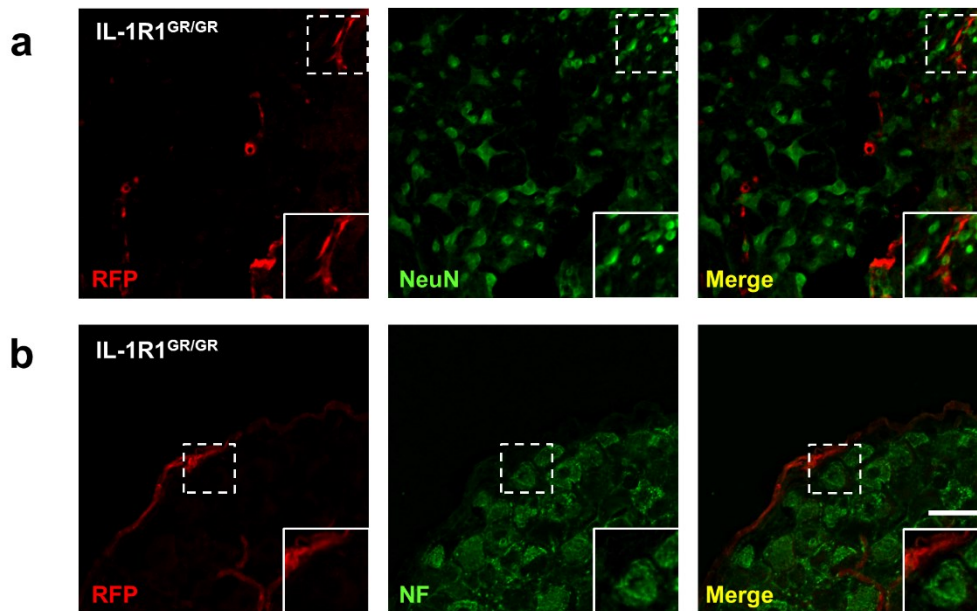

**Supplemental Figure 1. Spinal cord and DRG neurons do not express IL-1R1.** (a) Immunofluorescence labeling of RFP and NeuN in the spinal cord sections. (b) Immunofluorescence labeling of RFP and neurofilament (NF) in the DRG sections. Both sections were from IL-1R1<sup>GR/GR</sup> mice. Dashed square marks the area shown at higher magnification on the bottom right. Scale bar, 50  $\mu$ m.
